# Supplementary material
Source: PubMed Central journal article supplement (PMC8765461)
Supplement: jb.00297-21-s0001.pdf [file jb.00297-21-s0001.pdf]

Putrescine and its metabolic precursor arginine promote biofilm and c-di-GMP synthesis in  
*Pseudomonas aeruginosa*

Zhexian Liu, Sarzana S. Hossain, Zayda Morales Moreira, and Cara H. Haney

**Supplemental Figures and Tables**

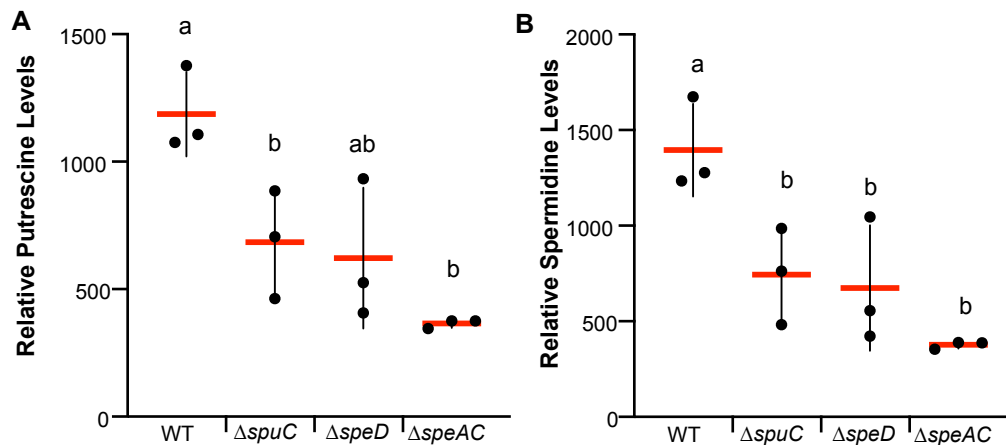

**Figure S1. Mutants in predicted polyamine catabolism and biosynthesis genes have reduced levels of putrescine and spermidine.** *P. aeruginosa* PAO1  $\Delta spuC$  (putrescine catabolism),  $\Delta speD$  (spermidine biosynthesis), and  $\Delta speAC$  (putrescine biosynthesis) mutants were grown in M63 media without exogenous arginine or putrescine. Targeted metabolomics was used to quantify putrescine or spermidine levels. All 3 mutants had significant reductions in both spermidine and putrescine compared to wildtype cells. Mean  $\pm$  sd is shown; letters indicate genotypes with significantly different levels of polyamines by ANOVA and Tukey's HSD.

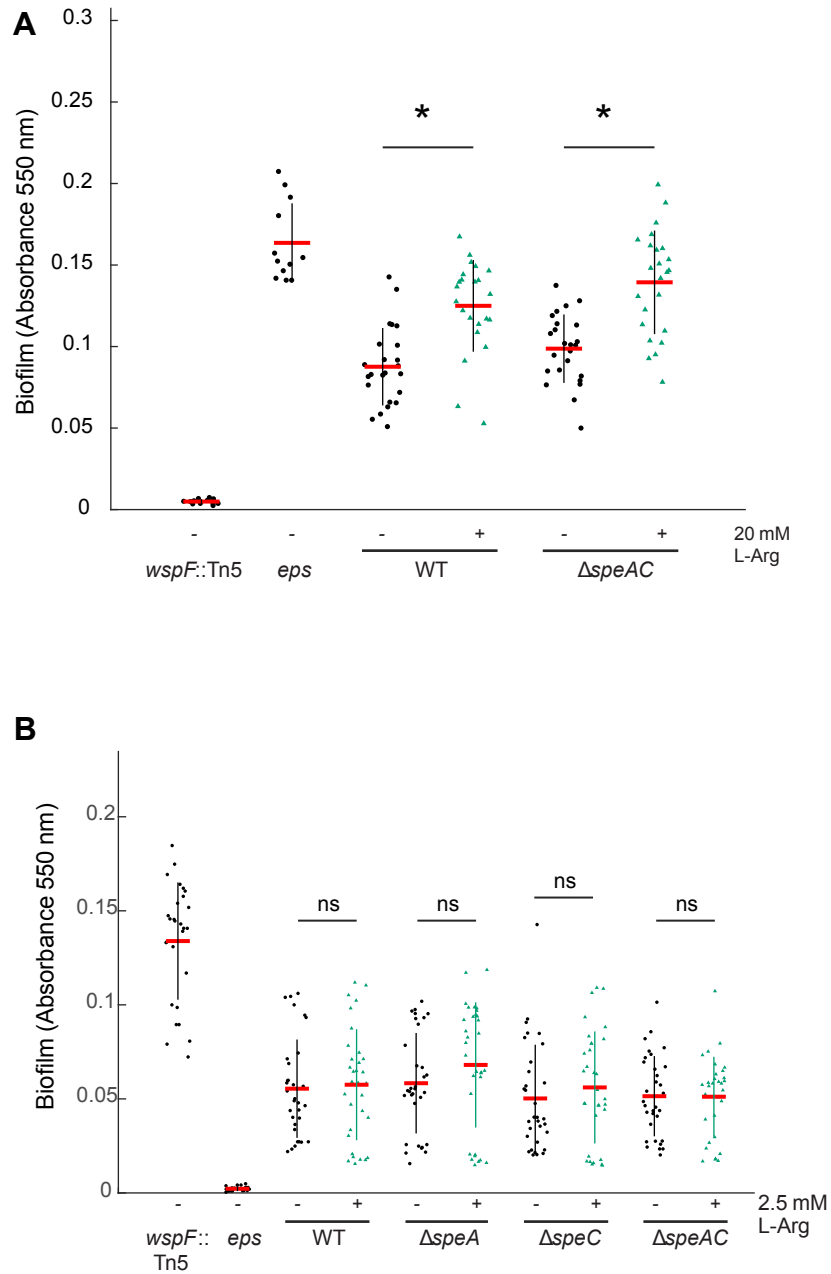

**Figure S2. L-arginine robustly promotes biofilm formation independent of SpeA and SpeC.** **A)** PAO1 or the *speAC* mutant were treated with 20 mM L-arginine or 20 mM of KCl as a control for the chloride ions in L-arginine HCl salt. \* indicates  $p < 0.0001$  by student's t-test. Error bars represent standard deviation. Data points show all technical replicates from 3 biological replicates. **B)** Wild-type *P. aeruginosa* PAO1 and  $\Delta$ *speA*,  $\Delta$ *speC*, and  $\Delta$ *speAC* mutants were treated with 2.5 mM L-arginine hydrochloride. At this concentration, L-arginine does not induce biofilm formation in any of the genetic backgrounds, including the L-arginine-accumulating  $\Delta$ *speA* and  $\Delta$ *speAC* strains. Error bars represent standard deviation. Data points show all technical replicates from 4 biological replicates.

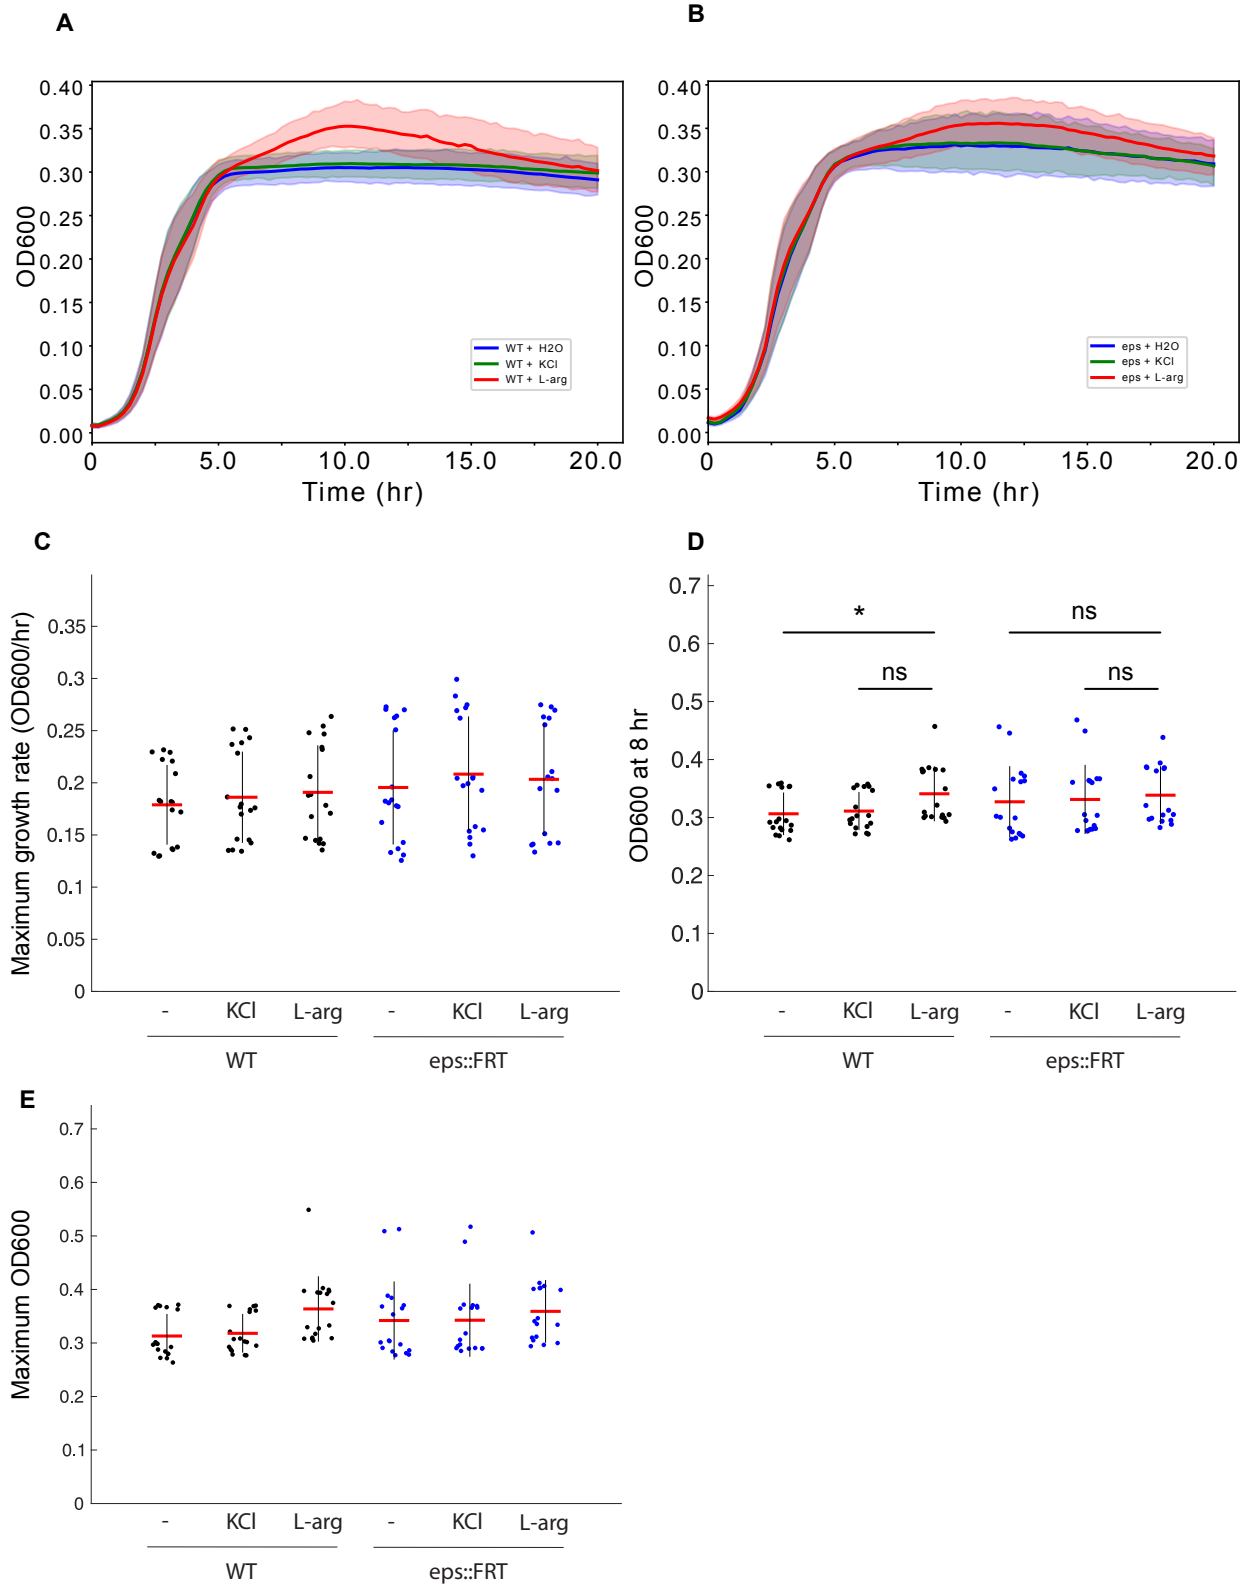

**Figure S3. Addition of exogenous L-arginine leads to a slight increase in bacterial density in wild-type but not in the  $\Delta eps::FRT$  strain. A-B)** Growth curves of *P. aeruginosa* PAO1 WT and  $\Delta eps::FRT$  strain in M63 supplemented with 20 mM L-arginine HCl, 20 mM KCl, or equal volume H<sub>2</sub>O (error bands represent 95% confidence intervals,  $n \geq 17$  from 3 biological replicates). **C)** L-arginine HCl supplementation does not affect the maximum growth rate of either wild-type or the  $\Delta eps::FRT$  strain. **D)** While the L-arginine HCl supplementation increases the maximum of OD<sub>600</sub> at 8 hr (D), this increase is dependent on exopolysaccharide biosynthesis (\* $p < 0.05$  by student's t-test,  $n \geq 17$  from 3 biological replicates). **E)** The addition of L-arginine HCl or KCl does not significantly alter the maximum growth rate of either the WT or  $\Delta eps::FRT$  strain ( $p = 0.2477$  by one-way ANOVA,  $n \geq 17$  from 3 biological replicates).

**Table S1 Primers used in this study**

| <b>Names</b> | <b>Restriction sites</b> | <b>Sequences (5' → 3')</b>       |
|--------------|--------------------------|----------------------------------|
| speA-UpF     | HindIII                  | TTTAAAAGCTTCGCCTGTCCGGCGACG      |
| speA-UpRc    |                          | GCTAGCCAGGCGCGGTGATCTC           |
| speA-DnF     |                          | GCGCCTGGCTAGCCCGTCG              |
| speA-DnRc    | XbaI                     | CAATTTCTAGAGGCCCTGGTGGCGTTC      |
| speC-UpF     | HindIII                  | TTTAAAAGCTTCGCCCAGGTGACCCAG      |
| speC-UpRc    |                          | CGACTGCGGGTTGGGACTCCCAATG        |
| speC-DnF     |                          | CAACCCGCAGTCGCCTCTGCTAC          |
| speC-DnRc    | <i>Xba</i> I             | CAATTTCTAGAACGGGTTGTAGGCAATTTCCC |
| speD-UpF     | <i>Xba</i> I             | CTTAATCTAGAGCCCAAGGTGTTACGAAG    |
| speD-UpRc    |                          | CGTGTGCGACGTGGGGAACCTCTC         |
| speD-DnF     |                          | TTCCCCACGTCGCACACGAGGAAG         |
| speD-DnRc    | <i>Hind</i> III          | TTAAAAGCTTAGGCGCTGTACCAGGGC      |
| speE-UpF     | <i>Hind</i> III          | CTTAAAAGCTTGGCGGCCACCAGC         |
| speE-UpRc    |                          | GGTGAAGCGGGGCCGGGATCTCCC         |
| speE-DnF     |                          | GATCCCGGCCCGCTTCACCAAGAAG        |
| speE-DnRc    | <i>Xba</i> I             | CTTAATCTAGATCGCGATGCCGTCG        |
| spuC-UpF     | <i>Xba</i> I             | CTTAATCTAGAAGTGCTGCCGCTGTTC      |
| spuC-UpRc    |                          | CTCAGGGACGTCACACCTCTTCTATTCAAG   |
| spuC-DnF     |                          | GGTGTGACGTCCCTGAGCGGACTTTTG      |
| spuC-DnRc    | <i>Hind</i> III          | CTTAAAAGCTTGTAGCCGATGCCGATGG     |
| spuD-UpF     | <i>Hind</i> III          | CTTAAAAGCTTCCTGGAGAACATCCGCATC   |
| spuD-UpRc    |                          | TCGCGGAGCGGGGTAGCTCC             |
| spuD-DnF     |                          | ACCCCGCTCCGCGAGGAGCC             |
| spuD-DnRc    | <i>Xba</i> I             | CAATTTCTAGATCTTCTTCTCCGCCTGCAC   |
| GFPmut3-F    |                          | ATGTCTAAAGGTGAAGAATTATTC         |
| GFPmut3-Rc   |                          | TTATTTGTACAATTCATCCATACC         |
